# Supplementary material for: Attached Smoking Room Is a Source of PM2.5 in Adjacent Nonsmoking Areas
Source: Hindawi journal article supplement (doi:10.1155/2023/7290742), 2023-02-14
Supplement: f1 [file 7290742.f1.docx]

**Supporting Information**

**Attached smoking room is a source of PM2.5 in adjacent nonsmoking areas**

Wei Duϯ, Jinze Wang₤, Yuanchen Chen$, Bo Panϯ,*, Guofeng Shen₤, Nan Lin€,*

ϯYunnan Provincial Key Laboratory of Soil Carbon Sequestration and Pollution Control, Faculty of Environmental Science & Engineering, Kunming University of Science &Technology, Kunming 650500, China.

₤Laboratory of Earth Surface Processes, College of Urban and Environmental Sciences, Peking University, Beijing 100871, China

$Key Laboratory of Microbial Technology for Industrial Pollution Control of Zhejiang Province, College of Environment, Research Center of Environmental Science, Zhejiang University of Technology, Hangzhou 310032, China

€Department of Environmental Health, School of Public Health, Shanghai Jiao Tong University, Shanghai 200025, China

Corresponding authors:

Nan Lin, PhD

Associate Professor, Department of Environmental Health, School of Public Health, Shanghai Jiao Tong University, Email: linnan5945@sjtu.edu.cn

Bo Pan, PhD

Professor, Faculty of Environmental Science & Engineering, Kunming University of Science &Technology, Email: [panbocai@aliyun.com](mailto:panbocai@aliyun.com)

**This file includes:**

Table S1 PM2.5 concentrations in smoking rooms and nonsmoking rooms in previous studies and present study.

Table S2 General linear regression model results of log-transformed indoor PM2.5 in occupied rooms.

Table S3 General linear regression model results of log-transformed indoor PM2.5 in vacant rooms.

Figure S1 Locations and layout of three mahjong clubs.

Figure S2 Distributions of indoor and outdoor log-transformed PM2.5 concentrations during different periods by using 1-min and 15-min time resolution.

Figure S3 PM2.5 concentrations during open hours (13 to 19 o’clock) in Room 1 and outdoor, with date, people, ventilation conditions and smoking conditions as shown.

Table S1 PM2.5 concentrations in smoking rooms and nonsmoking rooms in previous studies and present study.

| **Country (City)** | **Time** | **Site** | **PM2.5 (µg/m3)** | | **Ref.** |
| --- | --- | --- | --- | --- | --- |
| **mean** | **range** |
| Switzerland | Dec. 2007 – Jan. 2008 | Smoking rooms in restaurants, bars, cafes, and a disco | 184.9 | / | 1 |
|  | Nonsmoking rooms | 57.4 | / |  |
| South Korea | Oct. – Dec., 2015 | Smoking PC game rooms, pubs, and billiards halls | 29.0 – 134.2 | / | 2 |
| Bangkok | / | Smoking rooms in airport | 151.9 | 29.8 – 488.9 | 3 |
|  |  | Nonsmoking rooms in airport | 11.9 | 10.2 – 13.5 |  |
| United Arab Emirates (Dubai) | / | Cigarette smoking room at home | 201.2 | / | 4 |
|  |  | Cigarette nonsmoking room at home | 96.7 | / |  |
|  |  | Hookah smoking room at home | 428.6 | / |  |
|  |  | Hookah nonsmoking room at home | 210.8 | / |  |
| Thailand | Mar.–Apr. 2013 | Smoking rooms in airport | 532.5 | / | 5 |
|  |  | Non-smoking rooms in airport | 13.8 | / |  |
| Almaty, Kazakhstan | Sep. – Oct., 2017 | Smoking zone in restaurants, cafes, and bars | 182.0 | / | 6 |
|  |  | Nonsmoking zone in restaurants, cafes, and bars | 56.5 | / |  |
|  |  | Smoking room in restaurants, cafes, and bars | 647.9 | / |  |
|  |  | Nonsmoking room in restaurants, cafes, and bars | 87.6 | / |  |
|  |  | Smoking restaurants, cafes, and bars | 180.3 | / |  |
|  |  | Nonsmoking restaurants, cafes, and bars | 26.2 | / |  |
| Colchester, UK | / | Smoking home, winter | 37 | / | 7 |
|  |  | Smoking home, summer | 16 | / |  |
|  |  | Nonsmoking home, winter | 6 | / |  |
|  |  | Nonsmoking home, summer | 9 | / |  |
| Nanchong, China | Jul. – Aug., 2020 | Smoking rooms in mahjong club | 410 | 10 – 2174 | This study |
|  |  | Nonsmoking rooms in mahjong club | 147 | 10 – 888 |  |

Table S2 General linear regression model results of log-transformed indoor PM2.5 in occupied rooms.

| **Factors** | **Regression coefficient (B)** | **Standard error** | ***p-*value** |
| --- | --- | --- | --- |
| Club 2 (ref. Club1) | -0.4490 | 0.02175 | <0.001 |
| Club 3 (ref. Club1) | 0.0947 | 0.01825 | <0.001 |
| Room size | -0.0113 | 0.00053 | <0.001 |
| log (Outdoor PM2.5) | -0.2580 | 0.01544 | <0.001 |
| Temperature | -0.1580 | 0.00288 | <0.001 |
| RH | -0.0246 | 0.00073 | <0.001 |
| Smoking people number | 0.2157 | 0.00637 | <0.001 |
| Cigarette number | 0.0129 | 0.00042 | <0.001 |
| Open window number | 0.2811 | 0.02950 | <0.001 |
| Operating AC number | 0.1645 | 0.01069 | <0.001 |

Table S3 General linear regression model results of log-transformed indoor PM2.5 in vacant rooms.

| **Factors** | **Regression coefficient (B)** | **Standard error** | ***p-*value** |
| --- | --- | --- | --- |
| Room size | -0.0073 | 0.00055 | <0.001 |
| log (Outdoor PM2.5) | 0.1444 | 0.01673 | <0.001 |
| Temperature | -0.1476 | 0.00331 | <0.001 |
| RH | -0.0608 | 0.00108 | <0.001 |
| Open window number | -0.3207 | 0.02723 | <0.001 |


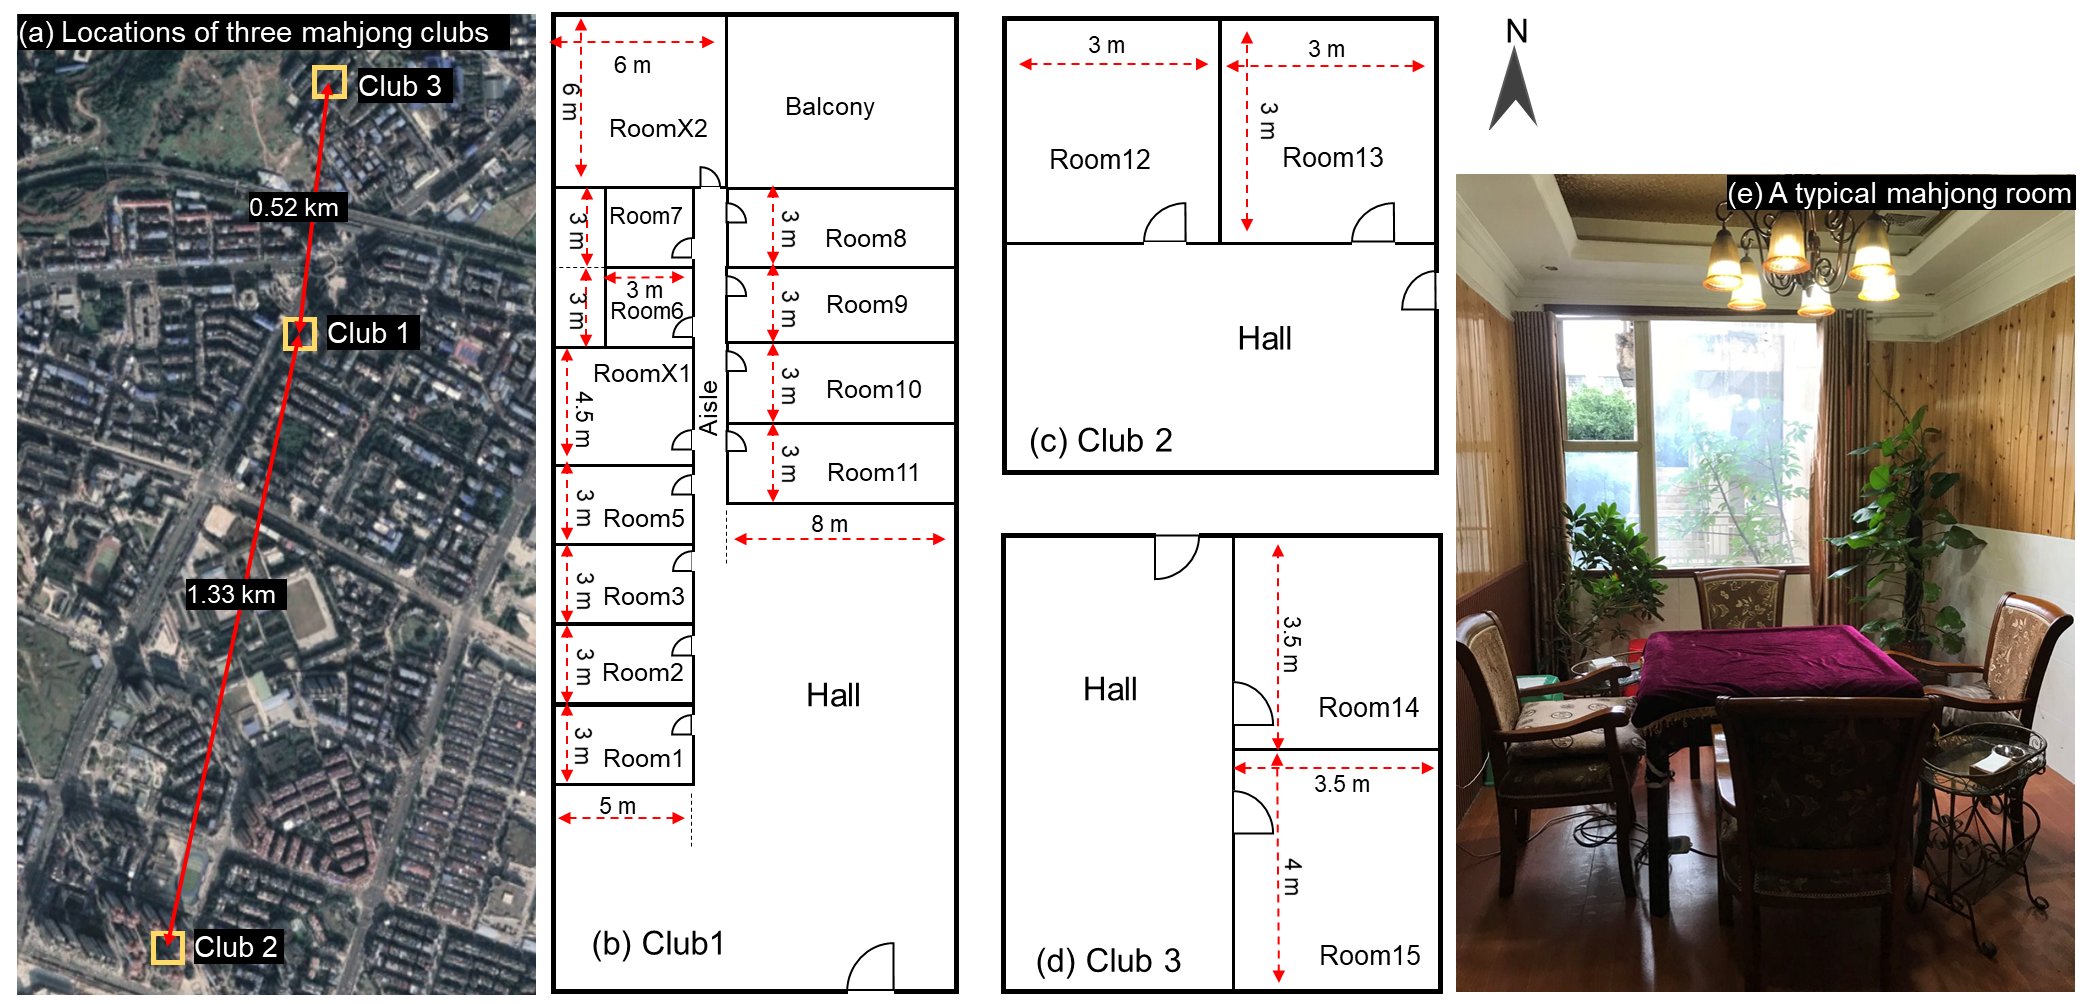


Figure S1 Locations and layout of three mahjong clubs. Heights in Club 1, 2, and 3 were 2.5, 3 and 3 meters, respectively.


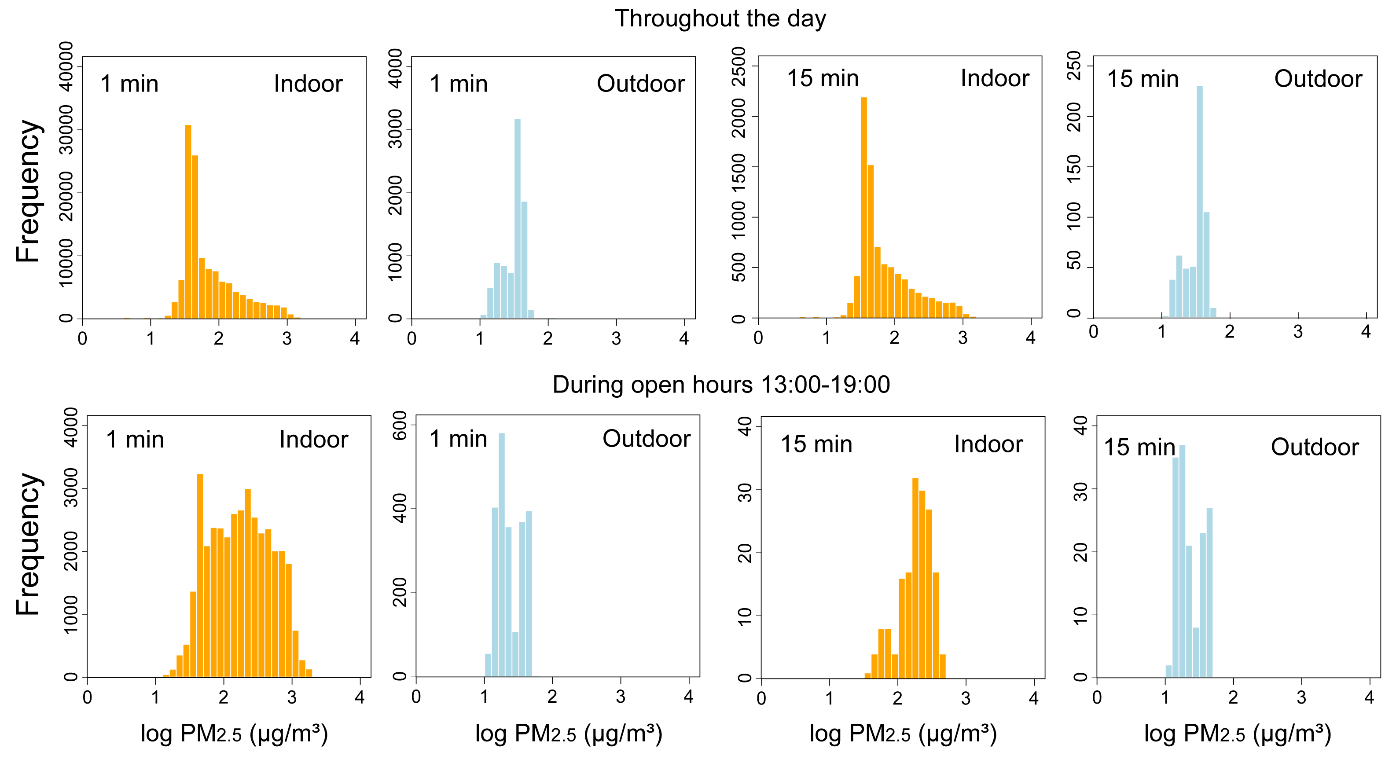


Figure S2 Distributions of indoor and outdoor log-transformed PM2.5 concentrations during different periods by using 1-min and 15-min time resolution.


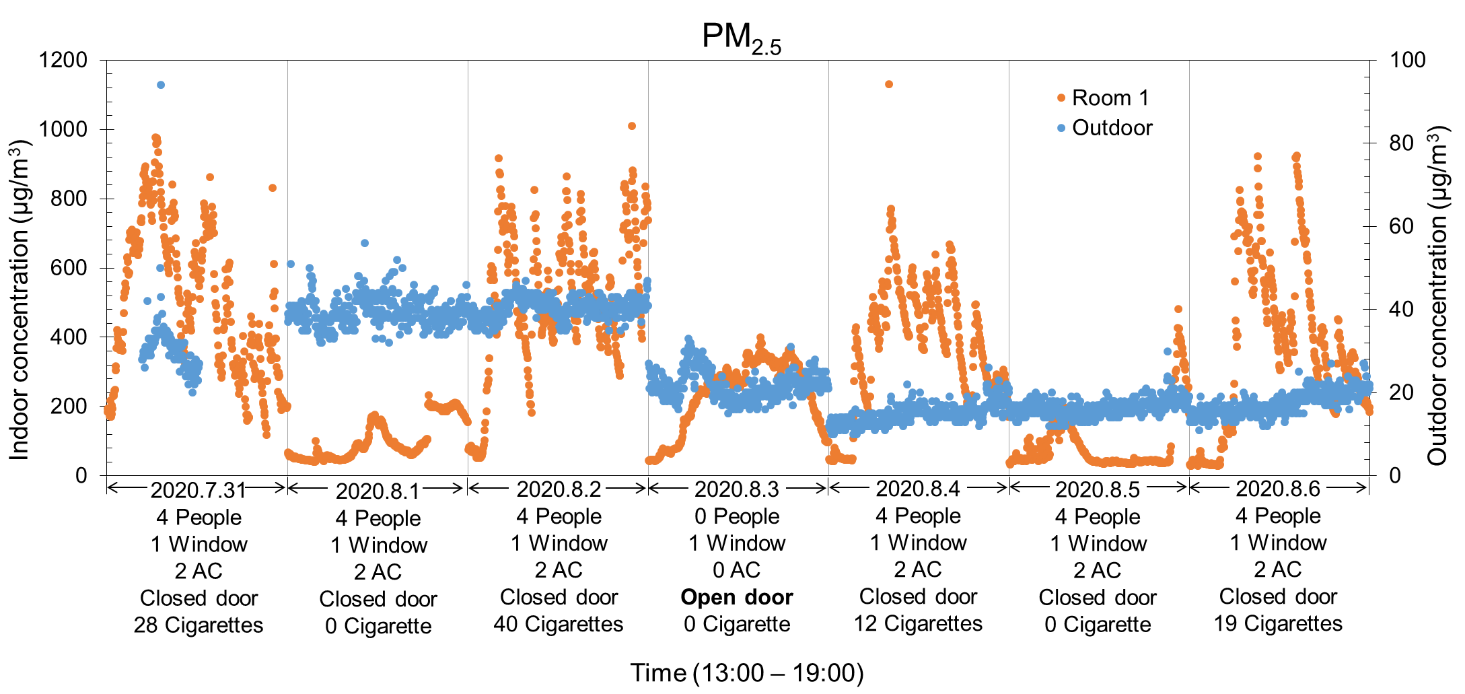


Figure S3 PM2.5 concentrations during open hours (13 to 19 o’clock) in Room 1 and outdoor, with date, people, ventilation conditions and smoking conditions as shown.

**Reference**

1. Huss, A.; Kooijman, C.; Breuer, M.; Böhler, P.; Zünd, T.; Wenk, S.; Röösli, M. Fine particulate matter measurements in Swiss restaurants, cafés and bars: What is the effect of spatial separation between smoking and non-smoking areas? *Indoor Air* **2010,** *20* (1), 52-60.

2. Lee, J. H.; Park, D.-U.; Ha, W. Evaluation of Indoor ETS Exposure Levels in Pubs, PC Game Rooms, and Billiards Halls around a University Campus using PM2.5 Concentrations. *Journal of Korean Society of Occupational and Environmental Hygiene* **2016,** *26* (4), 411-417.

3. Peesing, J.; Charoenca, N.; Tipayarom, A.; Kungskulniti, N.; Hamann, S. L.; Pitayarangsarit, S. Tobacco Smoke Pollution from Designated Smoking Rooms in Bangkok's Major International Airport. *Environment and Natural Resources Journal* **2015,** *13* (2), 26-32.

4. Weitzman, M.; Yusufali, A. H.; Bali, F.; Vilcassim, M. J. R.; Gandhi, S.; Peltier, R.; Nadas, A.; Sherman, S.; Lee, L.; Hong, Z.; Shearston, J.; Park, S. H.; Gordon, T. Effects of hookah smoking on indoor air quality in homes. *Tob. Control* **2017,** *26* (5), 586-591.

5. Kungskulniti, N.; Charoenca, N.; Peesing, J.; Trangwatana, S.; Hamann, S.; Pitayarangsarit, S.; Chitanondh, H. Assessment of secondhand smoke in international airports in Thailand, 2013. *Tob. Control* **2015,** *24* (6), 532-535.

6. Sadykova, J.; Baizhaxynova, A.; Crape, B. Air quality at venues of mixed smoking policies in Kazakhstan. *Tob. Induc. Dis.* **2020,** *18*.

7. Nasir, Z. A.; Colbeck, I. Particulate pollution in different housing types in a UK suburban location. *Sci. Total Environ.* **2013,** *445*, 165-176.
